# Supplementary material
Source: MDPI journal article supplement (https://www.mdpi.com/2306-5729/7/9/133)
Supplement: s1 [file s1]

*Supplementary Material*

# Prediction of retention indices and response factors of oxygenates for GC-FID by multilinear regression

Nils Kretzschmar, Markus Seifert\*, Oliver Busse and Jan J. Weigand\*

Technische Universität Dresden, Faculty of Chemistry and Food Chemistry, 01062 Dresden, Germany

\* Correspondence: markus.seifert1@tu-dresden.de (M.S.); jan.weigand@tu-dresden.de (J.J.W.)

## Additional materials and methods

Table S1 Comparison of the different operation conditions for the detailed hydrocarbon analysis (DHA) method.

| Parameter            |                           | D 6729 -14 <sup>1</sup>         | D 6730 - 01 <sup>2</sup> | D 6733 - 01 <sup>3</sup>   |                      | Used                       |
|----------------------|---------------------------|---------------------------------|--------------------------|----------------------------|----------------------|----------------------------|
| Injector settings    | Temperature               | 250 °C                          | 250 °C                   | 250 °C                     |                      | 290                        |
|                      | Split ratio               | 175:1 – 275:1                   | 150:1                    | 250:1                      | 200:1                | 100                        |
|                      | Liner                     | Deactivated glass               | n.d.                     | n.d.                       |                      | Quartz glass               |
|                      | Injection volume          | 0.2 – 0.5 µL                    | 0.1 – 0.2 µL             | 0.5 µL                     | 0.3 µL               | 0.1 µL                     |
| Detector settings    | FID temperature           | 300 – 350 °C                    | 250 °C                   | 280 °C                     |                      | 250 °C                     |
| Gas flows            | Hydrogen                  | 30 – 40 mL/min                  | 30 mL/min                | n.d.                       |                      | 34.5 mL/min                |
|                      | Air                       | 300 – 450 mL/min                | 300 mL/min               | n.d.                       |                      | 400 mL/min                 |
|                      | Nitrogen make-up          | 30 mL/min                       | 20 mL/min                | n.d.                       |                      | Not used                   |
| Column oven settings | Initial temperature       | 0 °C                            | 5 °C                     | 35 °C                      | Column oven settings | 35 °C                      |
|                      | Initial time              | 15 min                          | 10 min                   | 10 min                     | 15 min               | 13 min                     |
|                      | 1 <sup>st</sup> ramp rate | 1.0 K/min                       | 5.0 K/min                | 1.1 K/min                  | 1.3 K/min            | 10.0 K/min                 |
|                      | Final temperature         | 50 °C                           | 50 °C                    | 114 °C                     | 70 °C                | 45 °C                      |
|                      | Final time                | 0 min                           | 50 min                   | 0 min                      |                      | 15 min                     |
|                      | 2 <sup>nd</sup> ramp rate | 2.0 K/min                       | 1.5 K/min                | 1.7 K/min                  |                      | 1.0 K/min                  |
|                      | Final temperature         | 130 °C                          | 200 °C                   | 250 °C                     |                      | 60 °C                      |
|                      | Final time                | 0 min                           | 5 min                    | 5 min                      | 20 min               | 5 or 120 min               |
|                      | 3 <sup>rd</sup> ramp rate | 4.0 K/min                       | -                        | -                          |                      | 1.9 K/min                  |
| Column Requirements  | Final temperature         | 270 °C                          | -                        | -                          |                      | 200 °C                     |
|                      | Length                    | 100 m                           | 100 m                    | 50 m                       |                      | 100 m                      |
|                      | Inside diameter           | 0.25 mm                         | 0.25 mm                  | 0.2 mm                     |                      | 0.25 mm                    |
|                      | Liquid phase              | 100 % dime-<br>thylpolysiloxane | n.d.                     | 100 % dimethylpolysiloxane |                      | 100 % dimethylpolysiloxane |
|                      | Film thickness            | 0.5 µm                          | 0.5 µm                   | 0.5 µm                     |                      | 0.5 µm                     |
|                      | Pressure                  | 40 – 50 psig                    | 40 psig                  | 30 psig                    | 27 psig              | 37 psig                    |
|                      | Flow                      | 1.7 – 2.0 mL/min                | n.d.                     | 0.9 mL/min                 | 0.7 mL/min           | n.d.                       |
| Total analysis time  | Linear gas velocity       | 24.5 cm/s                       | 24 cm/s at 35°C          | 22 cm/s                    | 21.5 cm/s            | n.d.                       |
|                      |                           | 140 – 150 min                   | 174 min                  | 139 min                    | 187 min              | 139 or 254 min             |

## Backward regression

Table S2 Overview of the individual steps of the performed backward regression for RF and RI starting from an  $R^2$  of 0.9341 and 0.98798.

|   | Eliminated factor                          | Response factor (RF) |                         | Retention index (RI) |                         |
|---|--------------------------------------------|----------------------|-------------------------|----------------------|-------------------------|
|   |                                            | p-value              | $R^2$ after elimination | p-value              | $R^2$ after elimination |
| 1 | Categorical Aldehyde<br>Categorical Ketone | 1.0000<br>1.0000     | 0.933116                | 1.0000<br>1.0000     | 0,98781                 |
| 2 | Categorical Ether<br>Nr. of ether groups   | 0.84891<br>0.78010   | 0.933025                | 0.73218<br>0.00834   | 0.98565                 |
| 3 | Aromaticity                                | 0.93456              | 0.933017                | 0.33560              | 0.98544                 |
| 4 | Melting point                              | 0.69950              | 0.923823                | 0.09105              | 0.98365                 |
| 5 | Boiling point                              | 0.70051              | 0.923691                | 0.00000              | 0.978393                |
| 6 | C-number in the ring structure             | 0.87947              | 0.923671                | 0.00377              | 0.976165                |
| 7 | Interaction O-H                            | 0.56311              | 0.923379                | 0.96903              | 0.976165                |
| 8 | Number of Alkylgroups                      | 0.13744              | 0.921445                | 0.08142              | 0.975323                |
| 9 | Interaction C-H<br>Interaction C-O         | -<br>-               | -<br>-                  | 0.38956<br>0.29071   | 0.974892                |

## Design of experiments

Table S3 Plackett-Burman design for 24 runs and 11 factors A-K on two levels; description of factors, see Table 2 of the main manuscript.

| Nbr. | A | B | C | D | E | F | G | H | I | J | K |
|------|---|---|---|---|---|---|---|---|---|---|---|
| 1    | - | - | + | - | + | + | + | - | - | - | + |
| 2    | - | - | + | - | - | + | - | + | + | + | - |
| 3    | - | - | - | + | - | - | + | - | + | + | + |
| 4    | - | + | - | + | + | + | - | - | - | + | - |
| 5    | - | + | - | - | + | - | + | + | + | - | - |
| 6    | - | + | + | + | - | - | - | + | - | - | + |
| 7    | + | + | + | - | - | - | + | - | - | + | - |
| 8    | + | + | + | + | + | + | + | + | + | + | + |
| 9    | + | + | - | - | - | + | - | - | + | - | + |
| 10   | + | - | - | + | - | + | + | + | - | - | - |
| 11   | + | - | - | - | + | - | - | + | - | + | + |
| 12   | + | - | + | + | + | - | - | - | + | - | - |
| 13   | + | + | - | + | - | - | - | + | + | + | - |
| 14   | + | + | - | + | + | - | + | - | - | - | + |
| 15   | + | + | + | - | + | + | - | + | - | - | - |
| 16   | + | - | + | - | - | - | + | + | + | - | + |
| 17   | + | - | + | + | - | + | - | - | - | + | + |
| 18   | + | - | - | - | + | + | + | - | + | + | - |
| 19   | - | - | - | + | + | + | - | + | + | - | + |
| 20   | - | - | - | - | - | - | - | - | - | - | - |
| 21   | - | - | + | + | + | - | + | + | - | + | - |
| 22   | - | + | + | - | + | - | - | - | + | + | + |
| 23   | - | + | + | + | - | + | + | - | + | - | - |
| 24   | - | + | - | - | - | + | + | + | - | + | + |

## Database for Response factors and Retention indices

Table S4 Database of experimentally determined retention times ( $T_i$ ), retention indices (RI) and response factors (RF) used in this study.

| CAS        | Substance                      | $T_i$ [min]         | RI                 | RF                  |
|------------|--------------------------------|---------------------|--------------------|---------------------|
| 108-95-2   | Phenol                         | $80.548 \pm 0.004$  | $966.22 \pm 0.02$  | $1.3541 \pm 0.0185$ |
| 95-48-7    | 2-Methylphenol                 | $90.509 \pm 0.009$  | $1033.46 \pm 0.08$ | $1.2244 \pm 0.007$  |
| 108-39-4   | 3-Methylphenol                 | $93.061 \pm 0.007$  | $1054.69 \pm 0.06$ | $1.2899 \pm 0.0077$ |
| 106-44-5   | 4-Methylphenol                 | $92.95 \pm 0.005$   | $1053.78 \pm 0.04$ | $1.3136 \pm 0.0205$ |
| 526-75-0   | 2,3-Dimethylphenol             | $103.976 \pm 0.008$ | $1153.83 \pm 0.08$ | $1.1956 \pm 0.0076$ |
| 105-67-9   | 2,4-Dimethylphenol             | $101.074 \pm 0.005$ | $1124.27 \pm 0.05$ | $1.2473 \pm 0.0164$ |
| 95-87-4    | 2,5-Dimethylphenol             | $101.277 \pm 0.006$ | $1126.36 \pm 0.06$ | $1.2301 \pm 0.0134$ |
| 576-26-1   | 2,6-Dimethylphenol             | $96.529 \pm 0.006$  | $1082.62 \pm 0.05$ | $1.1756 \pm 0.01$   |
| 95-65-8    | 3,4-Dimethylphenol             | $105.379 \pm 0.006$ | $1167.82 \pm 0.06$ | $1.2535 \pm 0.011$  |
| 108-68-9   | 3,5-Dimethylphenol             | $103.077 \pm 0.006$ | $1144.76 \pm 0.06$ | $1.2534 \pm 0.0088$ |
| 697-82-5   | 2,3,5-Trimethylphenol          | $112.815 \pm 0.008$ | $1248.68 \pm 0.1$  | $1.2032 \pm 0.0072$ |
| 2416-94-6  | 2,3,6-Trimethylphenol          | $109.379 \pm 0.007$ | $1208.38 \pm 0.08$ | $1.1686 \pm 0.0072$ |
| 496-78-6   | 2,4,5-Trimethylphenol          | $112.441 \pm 0.013$ | $1244.35 \pm 0.07$ | $1.1887 \pm 0.0128$ |
| 527-60-6   | 2,4,6-Trimethylphenol          | $106.772 \pm 0.004$ | $1181.54 \pm 0.04$ | $1.1691 \pm 0.0045$ |
| 527-54-8   | 3,4,5-Trimethylphenol          | $116.48 \pm 0.001$  | $1290.33 \pm 0.02$ | $1.2142 \pm 0.0037$ |
| 621-34-1   | 3-Ethoxyphenol                 | $114.042 \pm 0.012$ | $1262.77 \pm 0.14$ | $1.8428 \pm 0.0573$ |
| 120-80-9   | Benzene-1,2-diol               | $105.443 \pm 0.022$ | $1168.46 \pm 0.21$ | $2.1456 \pm 0.0859$ |
| 452-86-8   | 4-Methyl-Benzene-1,2-diol      | $113.641 \pm 0.022$ | $1258.18 \pm 0.26$ | $2.0382 \pm 0.0837$ |
| 108-46-3   | Benzene-1,3-diol               | $112.16 \pm 0.037$  | $1241.1 \pm 0.42$  | $2.2816 \pm 0.0824$ |
| 488-87-9   | 2,5-Dimethyl-Benzene-1,3-diol  | $123.742 \pm 0.005$ | $1381.72 \pm 0.06$ | $1.6187 \pm 0.023$  |
| 123-31-9   | Benzene-1,4-diol               | $111.193 \pm 0.062$ | $1229.82 \pm 0.73$ | $2.2237 \pm 0.0132$ |
| 95-71-6    | 2-Methyl-Benzene-1,4-diol      | $117.282 \pm 0.021$ | $1299.26 \pm 0.24$ | $1.9936 \pm 0.0352$ |
| 608-43-5   | 2,3-Dimethyl-Benzene-1,4-diol  | $125.831 \pm 0.007$ | $1408.62 \pm 0.09$ | $1.884 \pm 0.1007$  |
| 654-42-2   | 2,6-Dimethyl-Benzene-1,4-diol  | $122.239 \pm 0.012$ | $1362.89 \pm 0.15$ | $2.011 \pm 0.0757$  |
| 90-05-1    | 2-Methoxyphenol                | $94.138 \pm 0.004$  | $1063.48 \pm 0.03$ | $1.6239 \pm 0.0191$ |
| 93-51-6    | 4-Methyl-2-Methoxyphenol       | $105.497 \pm 0.004$ | $1168.99 \pm 0.04$ | $1.5652 \pm 0.0073$ |
| 1195-09-1  | 5-Methyl-2-Methoxyphenol       | $104.837 \pm 0.004$ | $1162.44 \pm 0.04$ | $1.5658 \pm 0.0099$ |
| 100-66-3   | Methoxybenzene                 | $68.115 \pm 0.005$  | $894.37 \pm 0.02$  | $1.221 \pm 0.0034$  |
| 578-58-5   | 2-Methyl-1-Methoxybenzene      | $84.81 \pm 0.003$   | $990.16 \pm 0.02$  | $1.161 \pm 0.003$   |
| 100-84-5   | 3-Methyl-1-Methoxybenzene      | $86.139 \pm 0.009$  | $997.38 \pm 0.05$  | $1.2238 \pm 0.007$  |
| 104-93-8   | 4-Methyl-1-Methoxybenzene      | $86.205 \pm 0.01$   | $997.73 \pm 0.06$  | $1.2201 \pm 0.0056$ |
| 91-16-7    | 1,2-Dimethoxybenzene           | $99.887 \pm 0.02$   | $1111.93 \pm 0.2$  | $1.5449 \pm 0.0096$ |
| 151-10-0   | 1,3-Dimethoxybenzene           | $102.661 \pm 0.009$ | $1140.54 \pm 0.09$ | $1.6106 \pm 0.0082$ |
| 150-78-7   | 1,4-Dimethoxybenzene           | $102.287 \pm 0.005$ | $1136.73 \pm 0.05$ | $1.5992 \pm 0.0131$ |
| 4463-33-6  | 3-Methyl-1,2-Dimethoxybenzene  | $103.807 \pm 0.008$ | $1152.12 \pm 0.08$ | $1.4025 \pm 0.0077$ |
| 494-99-5   | 4-Methyl-1,2-Dimethoxybenzene  | $109.205 \pm 0.001$ | $1206.31 \pm 0.01$ | $1.4888 \pm 0.0051$ |
| 24599-58-4 | 2-Methyl-1,4-Dimethoxybenzene  | $110.753 \pm 0.003$ | $1224.65 \pm 0.03$ | $1.4806 \pm 0.0059$ |
| 67-56-1    | Methanol                       | $7.641 \pm 0.002$   | $315.22 \pm 0.21$  | $2.8888 \pm 0.0111$ |
| 64-17-5    | Ethanol                        | $8.592 \pm 0.002$   | $415.02 \pm 0.13$  | $2.0581 \pm 0.0086$ |
| 96-41-3    | Cyclopentanol                  | $37.578 \pm 0.005$  | $768.17 \pm 0.02$  | $1.3147 \pm 0.013$  |
| 18729-48-1 | 3-Methylcyclopentanol – Isomer | $49.79 \pm 0.011$   | $823.95 \pm 0.05$  | $1.3095 \pm 0.011$  |

| CAS        | Substance                          | T <sub>i</sub> [min] | RI             | RF              |
|------------|------------------------------------|----------------------|----------------|-----------------|
| 18729-48-1 | 3-Methylcyclopentanol – Isomer     | 50.081 ± 0.024       | 825.27 ± 0.11  | 1.3095 ± 0.011  |
| 108-93-0   | Cyclohexanol                       | 60.322 ± 0.008       | 867.07 ± 0.03  | 1.2755 ± 0.0036 |
| 583-59-5   | cis-2-Methylcyclohexanol           | 72.542 ± 0.004       | 917.61 ± 0.03  | 1.2047 ± 0.0053 |
| 583-59-5   | trans-2-Methylcyclohexanol         | 73.983 ± 0.003       | 926.74 ± 0.02  | 1.2047 ± 0.0053 |
| 24965-90-0 | cis-3-Methylcyclohexanol           | 73.725 ± 0.002       | 925.12 ± 0.01  | 1.2999 ± 0.0064 |
| 7443-55-2  | trans-3-Methylcyclohexanol         | 73.999 ± 0.003       | 926.84 ± 0.02  | 1.2999 ± 0.0064 |
| 589-91-3   | 4-Methylcyclohexanol               | 74.309 ± 0.004       | 928.79 ± 0.02  | 1.2777 ± 0.0052 |
| 1502-24-5  | 2,3-Dimethylcyclohexanol – Isomer  | 85.307 ± 0.04        | 992.87 ± 0.22  | 1.1809 ± 0.0066 |
| 1502-24-5  | 2,3-Dimethylcyclohexanol – Isomer  | 89.649 ± 0.003       | 1026.18 ± 0.03 | 1.1809 ± 0.0066 |
| 1502-24-5  | 2,3-Dimethylcyclohexanol – Isomer  | 90.857 ± 0.001       | 1036.39 ± 0.01 | 1.1809 ± 0.0066 |
| 69542-91-2 | 2,4-Dimethylcyclohexanol – Isomer  | 82.351 ± 0.001       | 976.5 ± 0.01   | 1.2522 ± 0.005  |
| 69542-91-2 | 2,4-Dimethylcyclohexanol – Isomer  | 86.2 ± 0.006         | 997.71 ± 0.03  | 1.2522 ± 0.005  |
| 69542-91-2 | 2,4-Dimethylcyclohexanol – Isomer  | 87.631 ± 0.007       | 1008.8 ± 0.06  | 1.2522 ± 0.005  |
| 3809-32-3  | 2,5-Dimethylcyclohexanol – Isomer  | 82.218 ± 0.01        | 975.75 ± 0.05  | 1.2007 ± 0.01   |
| 3809-32-3  | 2,5-Dimethylcyclohexanol – Isomer  | 82.58 ± 0.004        | 977.79 ± 0.03  | 1.2007 ± 0.01   |
| 3809-32-3  | 2,5-Dimethylcyclohexanol – Isomer  | 86.107 ± 0.016       | 997.21 ± 0.09  | 1.2007 ± 0.01   |
| 3809-32-3  | 2,5-Dimethylcyclohexanol – Isomer  | 87.454 ± 0min        | 1007.25 ± 0    | 1.2007 ± 0.01   |
| 5337-72-4  | 2,6-Dimethylcyclohexanol – Isomer  | 80.843 ± 0.002       | 967.92 ± 0.01  | 1.1417 ± 0.019  |
| 5337-72-4  | 2,6-Dimethylcyclohexanol – Isomer  | 81.799 ± 0.003       | 973.37 ± 0.02  | 1.1417 ± 0.019  |
| 5337-72-4  | 2,6-Dimethylcyclohexanol – Isomer  | 86.737 ± 0.004       | 1000.97 ± 0.03 | 1.1417 ± 0.019  |
| 5715-23-1  | 3,4-Dimethylcyclohexanol – Isomer  | 90.057 ± 0.005       | 1029.64 ± 0.04 | 1.2598 ± 0.0094 |
| 5715-23-1  | 3,4-Dimethylcyclohexanol – Isomer  | 90.211 ± 0.006       | 1030.95 ± 0.05 | 1.2598 ± 0.0094 |
| 5441-52-1  | 3,5-Dimethylcyclohexanol – Isomer  | 82.637 ± 0.005       | 978.1 ± 0.03   | 1.2933 ± 0.0056 |
| 5441-52-1  | 3,5-Dimethylcyclohexanol – Isomer  | 83.079 ± 0.005       | 980.58 ± 0.03  | 1.2933 ± 0.0056 |
| 931-17-9   | Cyclohexane-1,2-diol – Isomer      | 90.113 ± 0.007       | 1030.11 ± 0.06 | 1.6845 ± 0.0182 |
| 931-17-9   | Cyclohexane-1,2-diol – Isomer      | 90.5 ± 0.011         | 1033.39 ± 0.09 | 1.6845 ± 0.0182 |
| 504-01-8   | Cyclohexane-1,3-diol – Isomer      | 95.16 ± 0.01         | 1071.71 ± 0.08 | 2.0963 ± 0.0508 |
| 504-01-8   | Cyclohexane-1,3-diol – Isomer      | 95.335 ± 0.011       | 1073.12 ± 0.09 | 2.0963 ± 0.0508 |
| 556-48-9   | Cyclohexane-1,4-diol – Isomer      | 95.071 ± 0.011       | 1071 ± 0.09    | 1.8529 ± 0.0151 |
| 556-48-9   | Cyclohexane-1,4-diol – Isomer      | 95.484 ± 0.009       | 1074.31 ± 0.07 | 1.8529 ± 0.0151 |
| 67-64-1    | Propane-2-on                       | 9.267 ± 0.003        | 454.85 ± 0.16  | 1.8895 ± 0.009  |
| 78-93-3    | Butane-2-on                        | 13.673 ± 0.005       | 574.16 ± 0.09  | 1.5564 ± 0.005  |
| 563-80-4   | 3-Methylbutane-2-on                | 18.522 ± 0.005       | 637.27 ± 0.05  | 1.3219 ± 0.0047 |
| 120-92-3   | Cyclopentanone                     | 35.875 ± 0.01        | 759.73 ± 0.05  | 1.3439 ± 0.0062 |
| 1120-72-5  | 2-Methylcyclopentanone             | 46.9 ± 0.007         | 810.52 ± 0.03  | 1.277 ± 0.0032  |
| 1757-42-2  | 3-Methylcyclopentanone             | 47.802 ± 0.007       | 814.8 ± 0.03   | 1.3205 ± 0.0027 |
| 108-94-1   | Cyclohexanone                      | 59.153 ± 0.011       | 862.67 ± 0.04  | 1.3039 ± 0.0068 |
| 591-24-2   | 3-Methylcyclohexanone              | 72.849 ± 0.01        | 919.57 ± 0.06  | 1.2555 ± 0.0031 |
| 589-92-4   | 4-Methylcyclohexanone              | 73.903 ± 0.014       | 926.24 ± 0.09  | 1.2826 ± 0.0043 |
| 932-51-4   | 2,5-Dimethylcyclohexanone – Isomer | 82.103 ± 0.016       | 975.09 ± 0.09  | 1.2596 ± 0.0128 |
| 932-51-4   | 2,5-Dimethylcyclohexanone – Isomer | 84.194 ± 0.015       | 986.77 ± 0.09  | 1.2596 ± 0.0128 |
| 2816-57-1  | 2,6-Dimethylcyclohexanone – Isomer | 82.336 ± 0.014       | 976.41 ± 0.08  | 1.1991 ± 0.0066 |
| 2816-57-1  | 2,6-Dimethylcyclohexanone – Isomer | 83.912 ± 0.015       | 985.21 ± 0.08  | 1.1991 ± 0.0066 |
| 5465-09-8  | 3,4-Dimethylcyclohexanone          | 89.064 ± 0.013       | 1021.17 ± 0.11 | 1.3188 ± 0.0051 |
| 2320-30-1  | 3,5-Dimethylcyclohexanone          | 81.686 ± 0.012       | 972.73 ± 0.07  | 1.2869 ± 0.0055 |
| 930-68-7   | 2-Cyclohexene-1-on                 | 67.708 ± 0.019       | 893.03 ± 0.06  | 1.3436 ± 0.0092 |
| 271-89-6   | Benzofuran                         | 82.601 ± 0.009       | 977.9 ± 0.05   | 1.1988 ± 0.0041 |
| 90-02-8    | 2-Hydroxybenzaldehyde              | 87.777 ± 0.008       | 1010.06 ± 0.07 | 1.5958 ± 0.0159 |

| CAS         | Substance                         | T <sub>i</sub> [min] | RI             | RF              |
|-------------|-----------------------------------|----------------------|----------------|-----------------|
| 71-41-0     | Pentanol                          | 35.231 ± 0.006       | 756.43 ± 0.03  | 1.2783 ± 0.0188 |
| 71-36-3     | Butanol                           | 19.503 ± 0.001       | 646.99 ± 0.01  | 1.3568 ± 0.0193 |
| 71-23-8     | Propane-1-ol                      | 11.968 ± 0.003       | 541.57 ± 0.06  | 1.5881 ± 0.0054 |
| 67-63-0     | Propane-2-ol                      | 9.578 ± 0.002        | 472.22 ± 0.1   | 1.8426 ± 0.0027 |
| 488-17-5    | 3-Methyl-1,2-Dihydroxybenzene     | 111.132 ± 0.011      | 1229.09 ± 0.13 | 1.8067 ± 0.0396 |
| 101-84-8    | Phenoxybenzen                     | 123.947 ± 0.003      | 1384.27 ± 0.04 | 1.094 ± 0.0028  |
| 14786-82-4  | 4-Methoxy-3-Methylphenol          | 114.179 ± 0.003      | 1264.33 ± 0.03 | 1.9013 ± 0.0104 |
| 134108-92-2 | (1S,2S)-(+)-2-Methoxycyclohexanol | 86.507 ± 0.004       | 999.36 ± 0.02  | 1.737 ± 0.0096  |
| 931-56-6    | Methoxycyclohexane                | 57.942 ± 0.01        | 858.03 ± 0.04  | 1.1442 ± 0.0789 |
| 3637-61-4   | Cyclopentanemethanol              | 65.945 ± 0.006       | 887.1 ± 0.02   | 1.2598 ± 0.0115 |

Table S5 Database of substances used for calibration and their producers including purity.

| CAS       | Substance                     | Producer                 | Purity |
|-----------|-------------------------------|--------------------------|--------|
| 108-95-2  | Phenol                        | TCI                      | > 99,5 |
| 95-48-7   | 2-Methylphenol                | TCI                      | > 99   |
| 108-39-4  | 3-Methylphenol                | Thermo Fisher Scientific | 99     |
| 106-44-5  | 4-Methylphenol                | Thermo Fisher Scientific | > 99   |
| 526-75-0  | 2,3-Dimethylphenol            | TCI                      | > 98   |
| 105-67-9  | 2,4-Dimethylphenol            | Thermo Fisher Scientific | 99     |
| 95-87-4   | 2,5-Dimethylphenol            | Thermo Fisher Scientific | > 99   |
| 576-26-1  | 2,6-Dimethylphenol            | Thermo Fisher Scientific | 99     |
| 95-65-8   | 3,4-Dimethylphenol            | Thermo Fisher Scientific | 99     |
| 108-68-9  | 3,5-Dimethylphenol            | Thermo Fisher Scientific | > 99   |
| 697-82-5  | 2,3,5-Trimethylphenol         | Thermo Fisher Scientific | > 98   |
| 2416-94-6 | 2,3,6-Trimethylphenol         | TCI                      | > 98   |
| 496-78-6  | 2,4,5-Trimethylphenol         | Thermo Fisher Scientific | 99     |
| 527-60-6  | 2,4,6-Trimethylphenol         | Thermo Fisher Scientific | 99     |
| 527-54-8  | 3,4,5-Trimethylphenol         | Thermo Fisher Scientific | 97     |
| 621-34-1  | 3-Ethoxyphenol                | Thermo Fisher Scientific | 98     |
| 120-80-9  | Benzene-1,2-diol              | Thermo Fisher Scientific | > 99   |
| 452-86-8  | 4-Methyl-Benzene-1,2-diol     | Thermo Fisher Scientific | 98     |
| 108-46-3  | Benzene-1,3-diol              | TCI                      | > 99   |
| 488-87-9  | 2,5-Dimethyl-Benzene-1,3-diol | Thermo Fisher Scientific | 95     |
| 123-31-9  | Benzene-1,4-diol              | Thermo Fisher Scientific | 99,5   |
| 95-71-6   | 2-Methyl-Benzene-1,4-diol     | Thermo Fisher Scientific | 99     |
| 608-43-5  | 2,3-Dimethyl-Benzene-1,4-diol | TCI                      | > 98   |
| 654-42-2  | 2,6-Dimethyl-Benzene-1,4-diol | TCI                      | > 98   |
| 90-05-1   | 2-Methoxyphenol               | Thermo Fisher Scientific | > 99   |
| 93-51-6   | 4-Methyl-2-Methoxyphenol      | Thermo Fisher Scientific | 99     |
| 1195-09-1 | 5-Methyl-2-Methoxyphenol      | TCI                      | > 98   |
| 100-66-3  | Methoxybenzene                | TCI                      | > 99   |

| CAS        | Substance                         | Producer                 | Purity |
|------------|-----------------------------------|--------------------------|--------|
| 578-58-5   | 2-Methyl-1-Methoxybenzene         | Thermo Fisher Scientific | 99     |
| 100-84-5   | 3-Methyl-1-Methoxybenzene         | Thermo Fisher Scientific | 99     |
| 104-93-8   | 4-Methyl-1-Methoxybenzene         | Thermo Fisher Scientific | 99     |
| 91-16-7    | 1,2-Dimethoxybenzene              | Thermo Fisher Scientific | > 99   |
| 151-10-0   | 1,3-Dimethoxybenzene              | TCI                      | > 99   |
| 150-78-7   | 1,4-Dimethoxybenzene              | TCI                      | > 99   |
| 4463-33-6  | 3-Methyl-1,2-Dimethoxybenzene     | Thermo Fisher Scientific | > 98   |
| 494-99-5   | 4-Methyl-1,2-Dimethoxybenzene     | TCI                      | > 99   |
| 24599-58-4 | 2-Methyl-1,4-Dimethoxybenzene     | TCI                      | > 98   |
| 67-56-1    | Methanol                          | Thermo Fisher Scientific | > 99,9 |
| 64-17-5    | Ethanol                           | Thermo Fisher Scientific | > 99,9 |
| 96-41-3    | Cyclopentanol                     | TCI                      | > 99   |
| 18729-48-1 | 3-Methylcyclopentanol – Isomer    | Sigma Aldrich            | 99     |
| 18729-48-1 | 3-Methylcyclopentanol – Isomer    | Sigma Aldrich            | 99     |
| 108-93-0   | Cyclohexanol                      | Thermo Fisher Scientific | 99     |
| 583-59-5   | cis-2-Methylcyclohexanol          | Thermo Fisher Scientific | 99     |
| 583-59-5   | trans-2-Methylcyclohexanol        | Thermo Fisher Scientific | 99     |
| 24965-90-0 | cis-3-Methylcyclohexanol          | TCI                      | > 98   |
| 7443-55-2  | trans-3-Methylcyclohexanol        | TCI                      | > 98   |
| 589-91-3   | 4-Methylcyclohexanol              | Thermo Fisher Scientific | 99     |
| 1502-24-5  | 2,3-Dimethylcyclohexanol – Isomer | TCI                      | > 98   |
| 1502-24-5  | 2,3-Dimethylcyclohexanol – Isomer | TCI                      | > 98   |
| 1502-24-5  | 2,3-Dimethylcyclohexanol – Isomer | TCI                      | > 98   |
| 69542-91-2 | 2,4-Dimethylcyclohexanol – Isomer | Sigma Aldrich            | > 99   |
| 69542-91-2 | 2,4-Dimethylcyclohexanol – Isomer | Sigma Aldrich            | > 99   |
| 69542-91-2 | 2,4-Dimethylcyclohexanol – Isomer | Sigma Aldrich            | > 99   |
| 3809-32-3  | 2,5-Dimethylcyclohexanol – Isomer | TCI                      | > 99   |
| 3809-32-3  | 2,5-Dimethylcyclohexanol – Isomer | TCI                      | > 99   |
| 3809-32-3  | 2,5-Dimethylcyclohexanol – Isomer | TCI                      | > 99   |
| 3809-32-3  | 2,5-Dimethylcyclohexanol – Isomer | TCI                      | > 99   |
| 5337-72-4  | 2,6-Dimethylcyclohexanol – Isomer | Thermo Fisher Scientific | 99     |
| 5337-72-4  | 2,6-Dimethylcyclohexanol – Isomer | Thermo Fisher Scientific | 99     |
| 5337-72-4  | 2,6-Dimethylcyclohexanol – Isomer | Thermo Fisher Scientific | 99     |
| 5715-23-1  | 3,4-Dimethylcyclohexanol – Isomer | TCI                      | > 97   |
| 5715-23-1  | 3,4-Dimethylcyclohexanol – Isomer | TCI                      | > 97   |
| 5441-52-1  | 3,5-Dimethylcyclohexanol – Isomer | TCI                      | > 98   |
| 5441-52-1  | 3,5-Dimethylcyclohexanol – Isomer | TCI                      | > 98   |
| 931-17-9   | Cyclohexane-1,2-diol – Isomer     | Thermo Fisher Scientific | 98     |
| 931-17-9   | Cyclohexane-1,2-diol – Isomer     | Thermo Fisher Scientific | 98     |
| 504-01-8   | Cyclohexane-1,3-diol – Isomer     | Thermo Fisher Scientific | 98     |



| CAS         | Substance                          | Producer                 | Purity |
|-------------|------------------------------------|--------------------------|--------|
| 504-01-8    | Cyclohexane-1,3-diol – Isomer      | Thermo Fisher Scientific | 98     |
| 556-48-9    | Cyclohexane-1,4-diol – Isomer      | TCI                      | > 99   |
| 556-48-9    | Cyclohexane-1,4-diol – Isomer      | TCI                      | > 99   |
| 67-64-1     | Propane-2-on                       | Thermo Fisher Scientific | > 99   |
| 78-93-3     | Butane-2-on                        | Thermo Fisher Scientific | > 99   |
| 563-80-4    | 3-Methylbutane-2-on                | TCI                      | > 99   |
| 120-92-3    | Cyclopentanone                     | TCI                      | > 99   |
| 1120-72-5   | 2-Methylcyclopentanone             | Thermo Fisher Scientific | 99     |
| 1757-42-2   | 3-Methylcyclopentanone             | Thermo Fisher Scientific | 99     |
| 108-94-1    | Cyclohexanone                      | Thermo Fisher Scientific | 99,8   |
| 591-24-2    | 3-Methylcyclohexanone              | TCI                      | > 97   |
| 589-92-4    | 4-Methylcyclohexanone              | TCI                      | > 98   |
| 932-51-4    | 2,5-Dimethylcyclohexanone – Isomer | TCI                      | > 95   |
| 932-51-4    | 2,5-Dimethylcyclohexanone – Isomer | TCI                      | > 95   |
| 2816-57-1   | 2,6-Dimethylcyclohexanone – Isomer | Thermo Fisher Scientific | 99     |
| 2816-57-1   | 2,6-Dimethylcyclohexanone – Isomer | Thermo Fisher Scientific | 99     |
| 5465-09-8   | 3,4-Dimethylcyclohexanone          | TCI                      | > 98   |
| 2320-30-1   | 3,5-Dimethylcyclohexanone          | TCI                      | > 98   |
| 930-68-7    | 2-Cyclohexene-1-on                 | Sigma Aldrich            | > 98   |
| 271-89-6    | Benzofuran                         | Thermo Fisher Scientific | 99,5   |
| 90-02-8     | 2-Hydroxybenzaldehyde              | TCI                      | > 98   |
| 71-41-0     | Pentanol                           | Thermo Fisher Scientific | 99     |
| 71-36-3     | Butanol                            | TCI                      | 99     |
| 71-23-8     | Propane-1-ol                       | TCI                      | > 99   |
| 67-63-0     | Propane-2-ol                       | TCI                      | > 99   |
| 488-17-5    | 3-Methyl-1,2-Dihydroxybenzene      | Sigma Aldrich            | 99     |
| 101-84-8    | Phenoxybenzen                      | TCI                      | 99     |
| 14786-82-4  | 4-Methoxy-3-Methylphenol           | AOB Chem USA             | 97     |
| 134108-92-2 | (1S,2S)-(+)-2-Methoxycyclohexanol  | Thermo Fisher Scientific | 99     |
| 931-56-6    | Methoxycyclohexane                 | TCI                      | > 99   |
| 3637-61-4   | Cyclopentanemethanol               | TCI                      | 98     |

## References

1. ASTM Standard D 6729 - 14. D 6729-14: Standard Test Method for Determination of Individual Components in Spark Ignition Engine Fuels by 100 Metre Capillary High Resolution Gas Chromatography. *ASTM International* **2014**, *04*, 51, doi:10.1520/D6729-14.
2. ASTM Standard D 6730 - 01. D 6730 - 01: Standard Test Method for Determination of Individual Components in Spark Ignition Engine Fuels by 100 – Meter Capillary High Resolution Gas. *ASTM International* **1999**, *05*, 1–23, doi:10.1520/D6730-01R11.2.
3. ASTM Standard D6733 - 01. D 6733 -01: Standard Test Method for Determination of Individual Components in Spark Ignition Engine Fuels by 50 – Meter Capillary High Resolution Gas. *ASTM International* **1999**, *05*, 1–23, doi:10.1520/D6733-01R16.
